# Supplementary figures and images for: Controllable synthesis of AlN nanostructures and their photoluminescence
Source: Royal Society of Chemistry journal article supplement (doi:10.1039/c7ce01335c), 2017-01-01

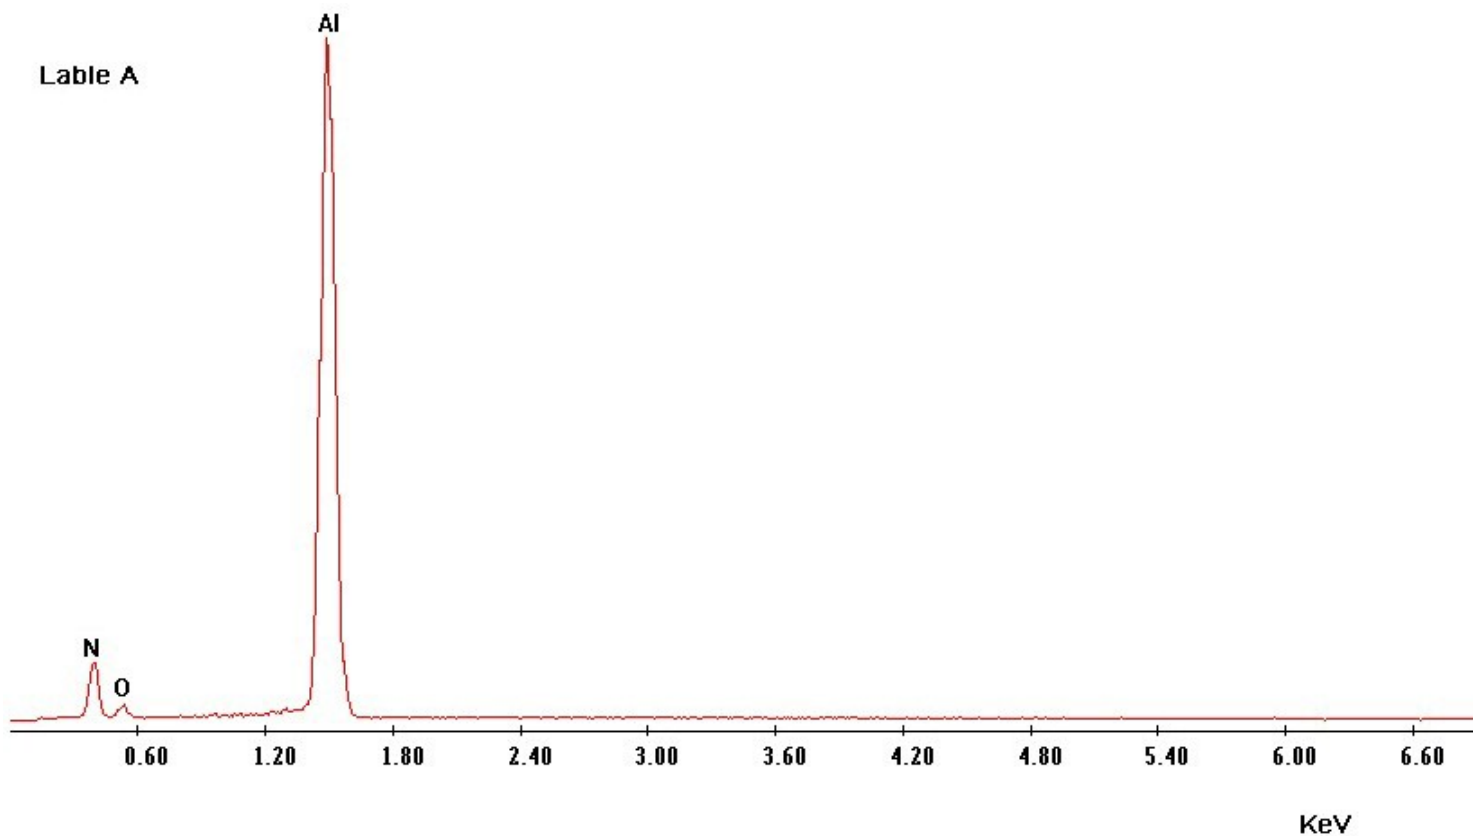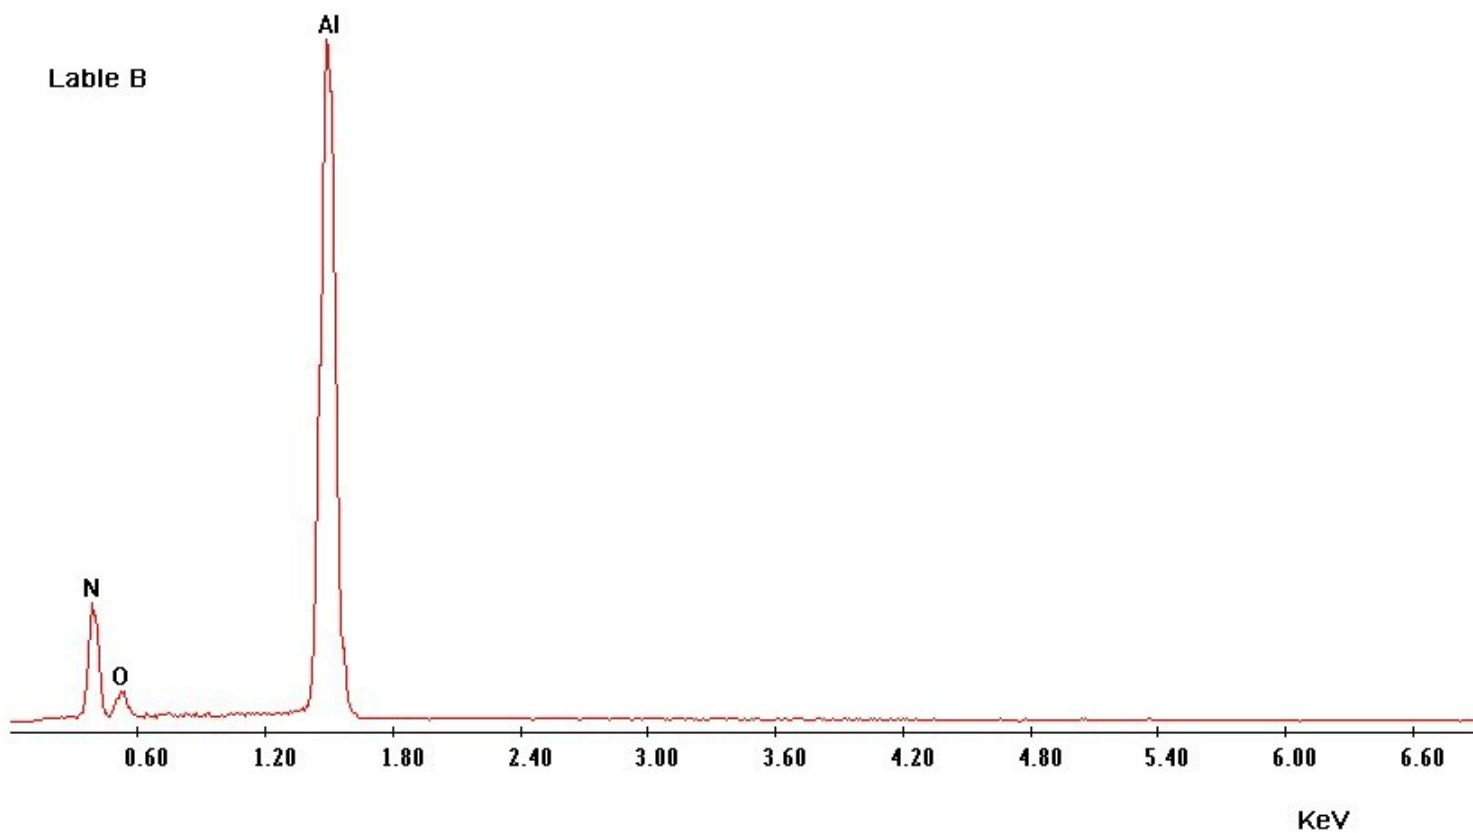

The EDS spectra from the AlN nanocones under the NH<sub>3</sub> flow of  
(A) 10 sccm, (B) 100 sccm at 950 °C.

Supplement: c7ce01335c1.pdf [file c7ce01335c1.pdf]
